# Supplementary material for: In-Depth Analysis of the Role of the Acinetobactin Cluster in the Virulence of Acinetobacter baumannii
Source: PubMed Central journal article supplement (PMC8524058; doi:10.3389/fmicb.2021.752070), 2021-10-05
Supplement: Image_1.pdf [file Image_1.pdf]

**A. Acinetobactin cluster**

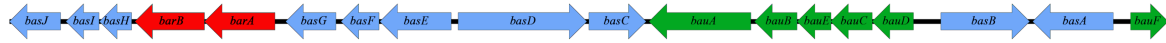

**B. Fimsbactin cluster**

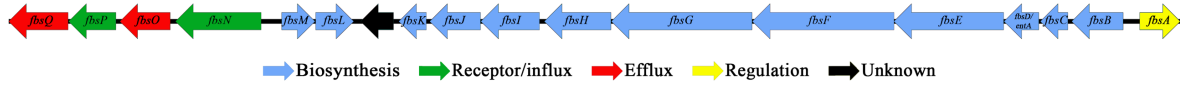

→ Biosynthesis    → Receptor/influx    → Efflux    → Regulation    → Unknown

**Supplementary Figure 1.** Genetic organization of the **(A)** acinetobactin and **(B)** fimsbactin clusters of *A. baumannii* ATCC 17978.
