# Supplementary material for: In-Depth Analysis of the Role of the Acinetobactin Cluster in the Virulence of Acinetobacter baumannii
Source: Frontiers journal article supplement (doi:10.3389/fmicb.2021.752070), 2021-10-05
Supplement: Image_8.PDF [file Image_8.PDF]

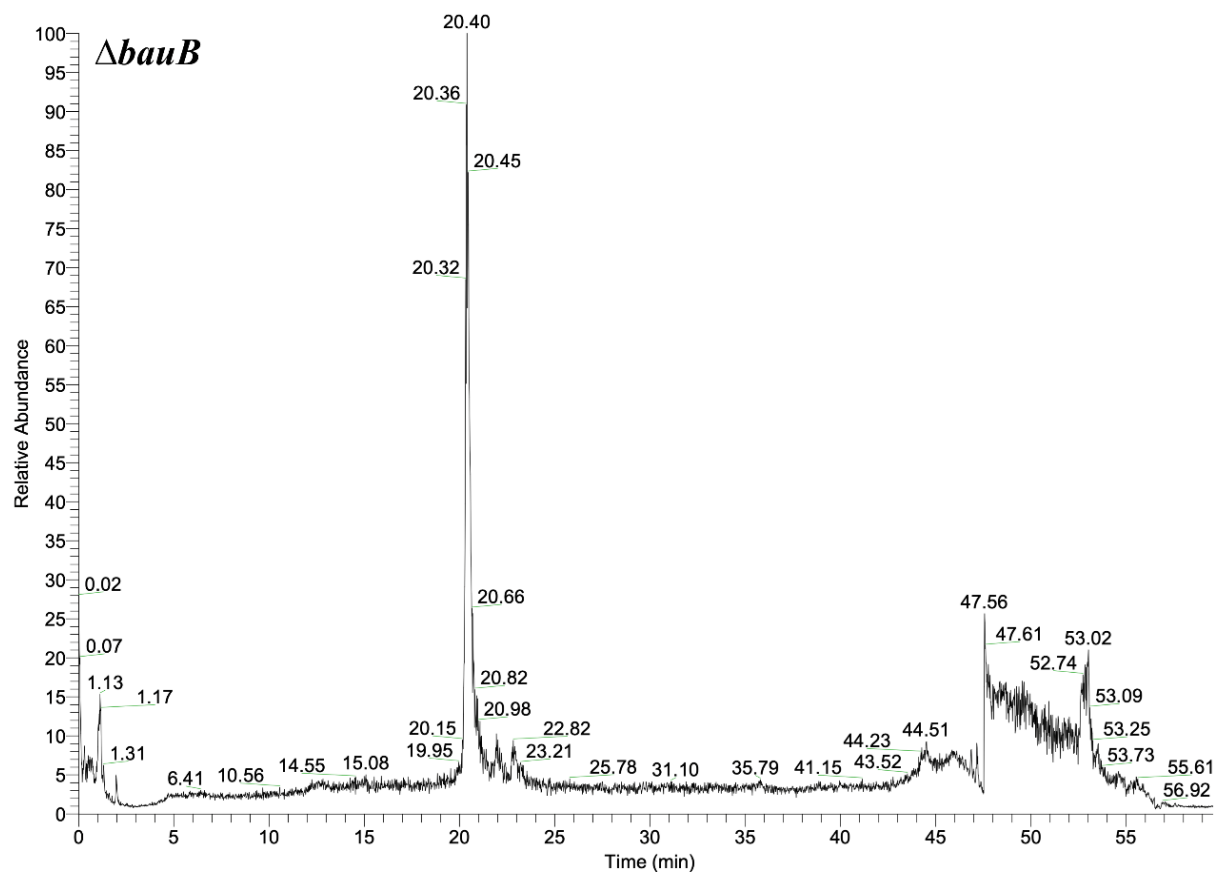

**Column** Discovery HS-F5

**Mobile Phase** A (Deionized water) and B (CH<sub>3</sub>CN)

**Gradient** 1) 40 minutes from 10 to 50% of B, 2) 5 minutes from 50 to 100 % of B, 3) isocratic step of 5 minutes at 100% of B, 4) 5 minutes from 100 to 10 % of B, 5) isocratic step of 5 minutes at 10% of B.

**Flow rate** 1 mL/min

**UV detector** 254, 280 and 313 nm

**MS detector** Full positive ion mode

**Supplementary Figure 8.** Total ion current (TIC) chromatogram of ABLHWA5 fraction eluted with 0:1 of H<sub>2</sub>O:CH<sub>3</sub>CN (v/v) from the *A. baumannii* mutant strain *ΔbauB* and HPLC/HRMS conditions used for the analysis
