# Supplementary material for: In-Depth Analysis of the Role of the Acinetobactin Cluster in the Virulence of Acinetobacter baumannii
Source: Frontiers journal article supplement (doi:10.3389/fmicb.2021.752070), 2021-10-05
Supplement: Image_13.PDF [file Image_13.PDF]

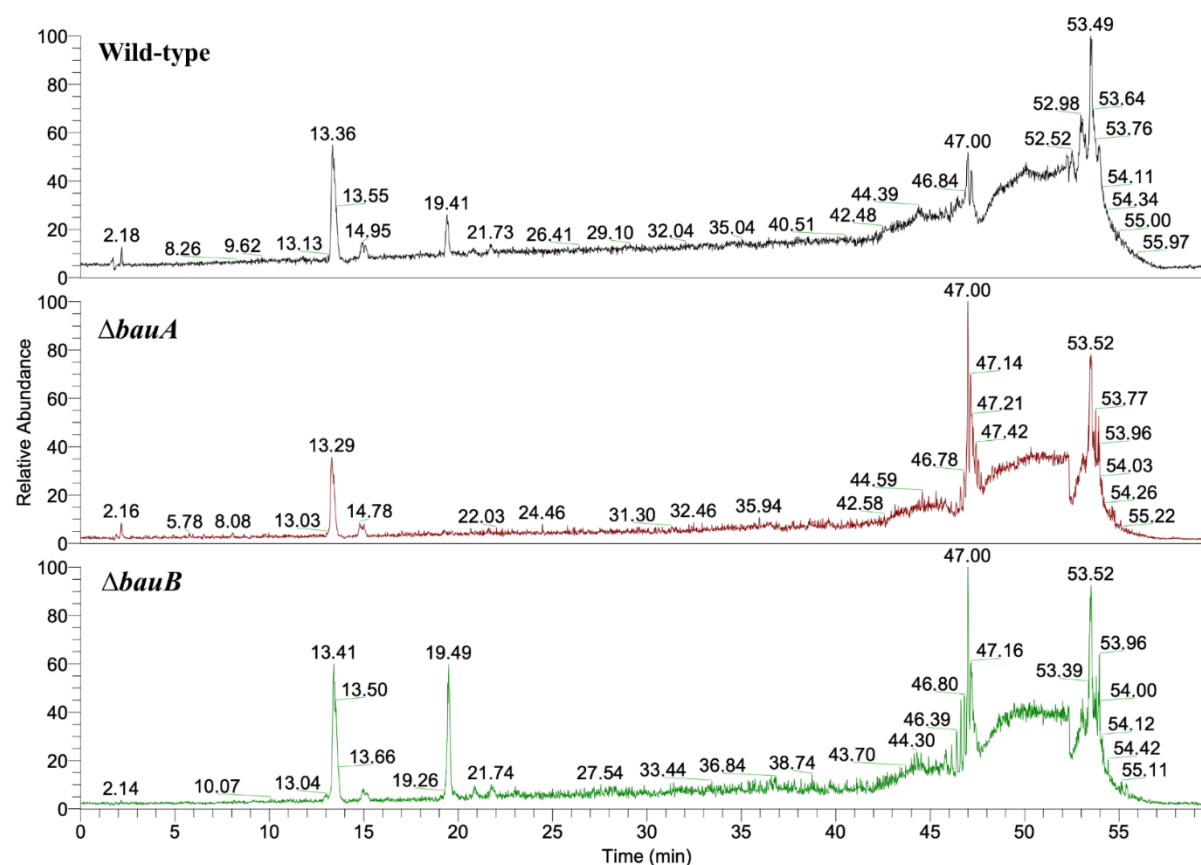

**Supplementary Figure 13.** Comparison between the total ion current (TIC) chromatographic profiles of the ABHL5 fractions of *A. baumannii* wild-type and mutant strains lacking genes involved in the influx of acinetobactin.
